# Supplementary material for: Peanut oil odor enhances the immunomodulatory effect on immunosuppressed mice by regulating the cAMP signaling pathway via the brain–spleen axis
Source: Royal Society of Chemistry journal article supplement (doi:10.1039/d3fo03629d), 2024-01-01
Supplement: d3fo03629d1.xlsx [file d3fo03629d1.xlsx]

## Sheet: Odor preference
Peanut oil (μL）	Numbers	Time (s)		Peppermint oil (μL）	Numbers	Time (s)
50	1	95.67		50	1	23.56
	2	108.03			2	32.42
	3	65.02			3	34.17
	4	66.59			4	16.25
	5	67.38			5	19.02
100	1	71.02		100	1	17.88
	2	58.16			2	20.18
	3	67.23			3	12.44
	4	53.58			4	31.95
	5	48.71			5	30.68
150	1	58.33		150	1	10.97
	2	65.96			2	21.27
	3	47.97			3	13.19
	4	52.15			4	18.23
	5	69.75			5	16.63
200	1	21.39		200	1	8.07
	2	59.03			2	10.08
	3	63.69			3	9.16
	4	64.06			4	15.54
	5	69.64			5	9.22
250	1	56.3		250	1	1.59
	2	44.61			2	0.73
	3	62.78			3	2.4
	4	53.6			4	1.68
	5	55.19			5	1.57

## Sheet: Volatile compounds
Volatile spiecies					Relative content (%)
	Peanut oil	Peppermint oil				Peanut oil	Peppermint oil
Hydrocarbons	5	17			Hydrocarbons	7.86	21.64
Acids	9	0			Acids	12.44	0
Alcohols	6	12			Alcohols	5.57	45.27
Aldehydes	21	1			Aldehydes	31.8	0.1
Esters	2	4			Esters	1.09	0.52
Ketones	5	7			Ketones	2.25	27
Furans	2	2			Furans	11.02	4.88
Pyrroles	2	0			Pyrroles	1.08	0
Pyrazines	9	0			Pyrazines	16.59	0
Phenols	2	0			Phenols	7.35	0
Others	1	1			Others	2.94	0.58

## Sheet: Body weight
	C										M										PS										PL										MS
	1	2	3	4	5	6	7	8	9	10	1	2	3	4	5	6	7	8	9	10	1	2	3	4	5	6	7	8	9	10	1	2	3	4	5	6	7	8	9	10	1	2	3	4	5	6	7	8	9
1d	22.5	23.4	22.6	23.5	23.1	21.4	21.7	22	22.9	22.2	20.8	23	21.4	22.8	21.8	23.6	21.5	22	21	23.1	20.6	22	20.4	21.6	21.8	22.2	23	21.5	21.5	23.3	23.9	23.7	22.8	23.2	22.4	22.1	22.2	23.2	22.5	22.5	20.7	22.5	20.2	22.8	22.1	22.6	23.8	23.8	23
2d	22.8	24.1	22	24	23.1	22.3	22.3	22.2	23.2	23	22	23.4	21.8	23.2	22.1	24.3	21.5	21.5	21.8	22.8	21.9	22.6	21.8	21.7	21.7	22.2	22.6	22.3	23.2	23.7	24.2	24.1	23.6	23.8	23.1	23.4	22.8	23.4	23.3	23	21.1	23	20.8	23.4	22.7	23	24.3	24.1	23.5
3d	23.2	24.2	22.6	24.6	23.5	22.7	22.1	22.8	23.2	23.4	23	23.9	23.1	23.1	22.7	24.4	21.8	21.7	21.8	23.4	21.8	23.1	21.4	21.8	21.4	22.4	23.5	23	23.8	24.5	24.5	24.4	23.8	24	22.9	24.2	23.4	24.4	23.4	23.6	22.4	22.3	22.5	23.1	22.7	23.9	24.5	23.9	23.4
4d	23.4	24.6	23.2	25	23.8	23.2	22.7	23.7	23.2	23.6	23.4	23.8	22.4	23.5	22.9	24.6	21.8	21.9	22.9	23.6	22.2	23.8	21.4	23.2	21.8	22.6	24.2	23.8	25.3	25.3	24.8	24.7	24.2	24.3	23.3	24.6	23.7	24.8	23.6	23.7	22.4	22.7	23.2	23.8	23.2	24	25	24.2	24
5d	23.9	24.8	23.2	25.8	24.2	23.9	23	23.5	23.7	23.8	23.8	24.4	23.3	23.7	23	24.7	21.6	22.3	23.4	23.9	22.8	24.6	21.7	23.7	22.7	22.9	24.5	23.4	24.8	25.6	24.9	24.8	24.3	24.8	24.5	25.1	24.1	25.4	24	24	23.2	23.2	23.2	24.3	23.5	24.6	24.8	24.9	24.2
6d	23.6	24.9	23.7	25.2	24.2	24	23.2	23.7	24.1	23.6	24.4	24.6	22.7	24	23.2	24.4	22	22.4	23.3	24	22.6	23.9	21.9	24	22.8	23	25.6	23.6	25.8	26.1	25	25	24.7	24.7	23.5	25.5	24.8	26	24.4	24.5	22.9	23.6	23.5	24.9	23.3	24.7	24.8	25.4	24.6
7d	23.8	24.7	24.3	25.8	23.8	24.4	23.5	24.3	24.5	24	24.8	25.1	23	24.2	24.5	24.8	22.2	22.4	23.7	24.1	22.9	24.5	22.6	24.3	23.6	23.6	24.5	23.8	25.8	26.3	25.5	25.5	25.6	25.7	23.6	26	25	26.4	24.6	24.7	23.3	24	23.9	24.8	23.3	25.1	25.6	25.4	25.2
8d	24.2	24.8	24.3	25.9	24.4	24.8	23.8	24.5	25.1	23.6	23.6	23.4	21.3	22.5	21.5	22.2	20.9	21.2	22.5	22.7	22.5	23.4	22.1	23.1	22.8	22.9	24.8	24	26.2	26.5	25	25	24.6	24.8	22.9	25.2	24.4	25.8	24.3	23.5	22.7	23.2	23.8	24.6	22.4	24.3	24.9	24.8	24.1
9d	24.7	25.7	24.3	25.7	24.8	25.6	23.5	24.5	24.9	23.6	21.8	22	19.8	21.2	19.7	21.2	20.1	19.6	21.4	21.2	21.9	23.4	20.8	22.9	21.9	22.7	24.9	24.1	24.9	25.4	24.5	23.9	24	24.3	22.5	23.9	23.2	24	22.4	21.5	21.5	22.1	22.6	23.4	21.4	23.3	23.7	23.3	23.4
10d	24.8	26.4	25.1	25.8	25	25.9	24.3	26	26	24.3	20.6	20.3	18	19.8	18.5	19.9	18.8	18.2	19.6	20.1	21.3	23.7	19.4	20.6	21.2	22.1	23.4	22.1	23.7	22.8	24.5	24.3	24.3	22.8	22.3	23.1	23.1	22.2	22.4	21.4	20.9	21.2	21.4	22.7	20.4	22.4	23.1	22.4	22.4
11d	25	26.7	25.3	26	25.4	26	24.4	26	26.3	24.7	21	20.1	17.9	19.6	18.2	20.2	18.8	17.8	20.3	19.6	20.7	24.2	19.2	20.8	21.5	22.6	22.1	21.1	22.9	21.6	24.9	24.6	24.8	25.1	23	23.2	24.5	23.1	22.5	22.8	21.4	22	21.9	23	20	22.2	23	22.6	22.1
12d	24.9	26.2	25.1	25.6	25.2	25.5	24.7	26.1	26	24.4	20.5	19.6	17.7	20	18.2	20.2	19.5	17.8	20.8	19.1	22.1	23.8	19.5	21.8	22.4	22.6	21.9	21.1	23.7	21.4	24.7	24.9	24.9	25	23.5	23.8	24.3	24.1	23.1	22.6	22.2	22.3	22	23.5	20.5	22.9	24.7	24.7	22.5
13d	25	26.5	25.2	25.7	25.5	25.2	24.2	26.3	26.4	24.8	20.8	19.7	17.5	19.9	18	21.1	19.6	18.9	21.3	20.5	21.6	24.2	19.7	23.2	21.8	21.8	22.3	21.4	24.7	21.6	25	26.1	26	25.9	23.8	25	24.5	25.1	23.3	22.7	21.5	22.3	22.6	24	20.6	23.1	24.3	24.3	22.9
14d	25	26.4	25.2	25.9	25.4	25.4	24.6	26.3	26	25.5	23.2	22.6	18.6	21.8	19	22.9	19.7	18.6	21.8	20.9	22.9	24.7	21.1	23.5	22.8	22	23.3	22.7	25.8	24	26	26.6	26.5	26.2	23.8	25.2	25.3	24.7	23.1	22.9	22.4	22.7	23	24.6	21.3	22.8	24.6	23.8	22.9
[truncated: 11 more columns]

## Sheet: Food intake
	C	M	PS	PL	MS	ML
1d	42.9	41.6	46	52.6	43.4	50.6
2d	44	42.7	44.8	56.2	44	49.8
3d	48.9	45	47.8	50	42.7	46.9
4d	47.1	41.1	46.3	50.7	43.8	47.6
5d	42.2	35.2	45.2	45.3	41.4	43.7
6d	42.4	38.1	44.3	48.2	33.6	40.6
7d	42	20.8	39.5	47.3	29.8	25.3
8d	43.5	13.7	28.7	33.5	20.8	18.3
9d	46.5	4.4	16.2	19.5	12	10.1
10d	45.9	18.6	30.3	26.6	17.2	23.1
11d	43.8	27	37.8	37.4	29.5	30.5
12d	40.9	29.6	41.1	44.2	31.7	35.4
13d	44.2	35.5	39.8	41.3	41	32.2
14d	43.6	38	48.4	45.9	42.8	44.4

## Sheet: ELISA
IL-2				IL-4				TNF-α				AgRP				NPY
Groups	Number	TNF-α (pg/mL)		Groups	Number	IL-4 (pg/mL)		Groups	Number	TNF-α (pg/mL)		Groups	Number	AgRP (pg/mL)		Groups	Number	NPY (pg/mL)
C	1	296.4		C	1	171.19		C	1	682.32		C	1	1069.68		C	1	1069.68
	2	273.84			2	146.34			2	609.15			2	907.5			2	907.5
	3	341.22			3	149.6			3	587.2			3	854.29			3	854.29
M	1	230.55		M	1	135.4		M	1	539.02		M	1	866.47		M	1	866.47
	2	240.3			2	129.43			2	534.76			2	791.47			2	791.47
	3	267.13			3	144.49			3	515.24			3	869.04			3	869.04
PS	1	297.93		PS	1	159.55		PS	1	606.1		PS	1	1208.14		PS	1	1208.14
	2	303.41			2	146.05			2	585.37			2	1049.81			2	1049.81
	3	311.04			3	167.5			3	582.93			3	990.83			3	990.83
PL	1	322.32		PL	1	168.78		PL	1	666.46		PL	1	1224.17		PL	1	1224.17
	2	311.34			2	158.41			2	639.63			2	1160.06			2	1160.06
	3	324.76			3	168.78			3	632.32			3	1078.01			3	1078.01
MS	1	272.62		MS	1	163.67		MS	1	628.05		MS	1	903.65		MS	1	903.65
	2	292.44			2	149.18			2	562.8			2	1085.06			2	1085.06
	3	298.84			3	148.32			3	563.41			3	813.27			3	813.27
ML	1	317.74		ML	1	169.49		ML	1	639.63		ML	1	910.71		ML	1	910.71
	2	288.78			2	161.68			2	587.8			2	940.83			2	940.83
	3	328.41			3	155.28			3	590.85			3	886.99			3	886.99
cAMP (Brain)				cAMP (Spleen)				Glu				GABA					GABA/Glu
Groups	Number	cAMP (pmol/mg)		Groups	Number	cAMP (pmol/mg)		Groups	Number	Glu (mg/g)		Groups	Number	GABA (μmol/g)		Groups	Number	GABA/Glu
C	1	23.7229		C	1	22.5703		C	1	0.062871		C	1	0.008481		C	1	0.128027
	2	21.4079			2	22.9056			2	0.069019			2	0.008073			2	0.12924
	3	21.2765			3	22.1849			3	0.066159			3	0.007953			3	0.140823
	4	26.7835			4	22.4717			4	0.066037			4	0.008048			4	0.135534
M	1	11.6514		M	1	11.1989		M	1	0.052829		M	1	0.008049		M	1	0.15055
	2	11.6109			2	11.2321			2	0.054524			2	0.009317			2	0.151751
	3	11.9657			3	10.7713			3	0.053041			3	0.008535			3	0.152198
	4	13.3001			4	11.2229			4	0.053033			4	0.009354			4	0.155547
PS	1	16.6803		PS	1	15.4837		PS	1	0.062412		PS	1	0.007714		PS	1	0.100703
	2	16.8379			2	15.3243			2	0.059092			2	0.007007			2	0.115633
	3	15.4051			3	14.5529			3	0.061391			3	0.005951			3	0.121079
	4	16.9783			4	15.0231			4	0.060599			4	0.007433			4	0.123594
PL	1	18.446		PL	1	18.2089		PL	1	0.069819		PL	1	0.006586		PL	1	0.082483
	2	20.0738			2	18.8629			2	0.066609			2	0.005494			2	0.086331
	3	20.2106			3	18.0007			3	0.067546			3	0.005831			3	0.094327
	4	20.5779			4	18.0533			4	0.073235			4	0.006859			4	0.093659
MS	1	15.1208		MS	1	14.0754		MS	1	0.045901		MS	1	0.011002		MS	1	0.227123
	2	15.9878			2	13.8675			2	0.05146			2	0.010425			2	0.22087
	3	16.8093			3	14.1324			3	0.049635			3	0.01064			3	0.215642
	4	17.724			4	14.3964			4	0.048175			4	0.010703			4	0.213795
ML	1	12.2249		ML	1	11.2803		ML	1	0.039012		ML	1	0.013361		ML	1	0.318129
	2	13.7856			2	11.4848			2	0.041709			2	0.012411			2	0.320324
	3	13.7376			3	11.1129			3	0.042516			3	0.014024			3	0.32205
	4	13.5084			4	11.906			4	0.041849			4	0.013477			4	0.329851

## Sheet: Spleen and thymus indices
Groups	Numbers	Spleen Index (mg/g)	Thymus Index (mg/g)
C	1	3.76	2.157
	2	3.46	2.192
	3	3.569	2.46
	4	3.686	2.143
	5	3.69	2.772
	6	3.968	2.559
	7	3.849	2.664
	8	3.67	2.671
M	1	2.691	1.076
	2	2.044	0.946
	3	2.523	0.957
	4	2.143	0.78
	5	2.348	1.198
	6	2.098	0.98
	7	2.188	1.036
	8	2.963	1.02
PS	1	2.944	1.126
	2	2.937	1.014
	3	3.333	1.195
	4	3.416	0.988
	5	3.231	1.703
	6	3.384	0.987
	7	3.9	1.079
	8	3.359	1.39
PL	1	3.527	2
	2	3.593	1.642
	3	3.383	1.401
	4	3.46	1.504
	5	3.32	1.646
	6	4.167	1.798
	7	3.412	1.404
	8	4.079	2.133
MS	1	2.641	1.102
	2	2.712	1.299
	3	2.885	1.144
	4	2.661	1.692
	5	3.008	1.459
	6	3.08	1.626
	7	2.815	1.472
	8	3.043	1.24
ML	1	2.632	1.111
	2	2.91	1.166
	3	2.857	0.889
	4	2.511	1.27
	5	3.378	1.276
	6	3.156	1.176
	7	3.077	0.988
	8	3.289	0.965

## Sheet: CD3CD4 and CD3CD8
Groups	Number	CD3CD4	CD3CD8
C	1	57.1	14.8
	2	56.5	13.8
	3	56	13.6
M	1	34	6.85
	2	35.9	5.5
	3	39.8	4.63
PS	1	52.9	12.4
	2	52.3	12.3
	3	50.5	12.1
PL	1	55.9	13.5
	2	55.1	13
	3	54.4	12.8
MS	1	54	12.5
	2	48.2	12.5
	3	46.6	11.9
ML	1	45.6	11.4
	2	45.5	11.2
	3	41.8	9.95

## Sheet: Immunohistochemistry
Hippocampus					Hypothalamus
Groups	Number	mGluR1/5	GABABR		Groups	Number	mGluR1/5	GABABR
C	1	0.06004	0.0648		C	1	0.084442	0.065252
	2	0.05797	0.0605			2	0.07918	0.064098
	3	0.05642	0.0625			3	0.063812	0.060125
M	1	0.05586	0.0648		M	1	0.044764	0.073097
	2	0.05687	0.0695			2	0.048686	0.067064
	3	0.05042	0.0608			3	0.048879	0.06706
PS	1	0.06781	0.0628		PS	1	0.050495	0.07102
	2	0.06518	0.0606			2	0.056501	0.068093
	3	0.06531	0.0573			3	0.061112	0.06604
PL	1	0.07871	0.0573		PL	1	0.066263	0.058198
	2	0.06878	0.0508			2	0.076168	0.056629
	3	0.06814	0.0565			3	0.067149	0.054314
MS	1	0.05556	0.0711		MS	1	0.042138	0.076245
	2	0.04912	0.0708			2	0.047779	0.07294
	3	0.0506	0.0676			3	0.054684	0.071054
ML	1	0.04862	0.0775		ML	1	0.053564	0.08648
	2	0.04077	0.0837			2	0.053227	0.082216
	3	0.03978	0.0763			3	0.0553	0.077131

## Sheet: Western blot
	C			M			PS			PL			MS			ML
Epac	1	1	1	0.969417	0.908696	0.890981	1.03437	1.02361	0.920559	1.1122	1.05336	1.09482	0.990639	0.944557	1.04555	1.10916	1.02775	1.00757
Rap1	1	1	1	0.778596	0.846874	0.864886	0.986108	1.00179	1.01217	1.02801	1.11065	1.0236	0.968191	0.952445	0.989449	0.944186	0.896653	0.959441
ERK1/2	1	1	1	0.750229	0.762765	0.622467	0.83965	0.858667	0.686159	1.01469	1.01689	0.927564	0.787882	0.859845	0.629605	0.856148	0.773242	0.708315
PKA	1	1	1	0.731163	0.856854	0.745044	1.2348	1.24493	0.96142	1.37692	1.48331	1.3137	1.34565	1.42513	1.18374	1.16482	1.40994	1.0216
CREB	1	1	1	0.873995	0.964163	0.941316	1.07457	0.965673	1.16683	1.26836	1.01772	1.23263	1.24088	0.99432	1.20027	1.25114	0.994294	1.17927
p-CREB	1	1	1	0.827556	0.926947	0.920299	1.13275	1.4832	1.12726	1.54825	1.62023	1.20524	1.19825	1.43139	1.09996	1.37475	1.21159	1.03738
p-CREB/CREB	1	1	1	0.946866	0.984735	0.954506	1.05414	1.27114	1.16734	1.22067	1.31445	1.18425	0.965645	1.19256	1.10624	1.0988	1.02741	1.04333
p-P65	1	1	1	0.726952	0.600169	0.748687	1.1081	0.720043	1.06962	1.75932	1.28699	1.95045	1.73735	0.626326	1.01859	1.41541	1.00474	1.41462
p-IKBα	1	1	1	0.81039	0.865425	0.794274	1.19539	1.06102	1.56714	1.88674	1.46927	1.91278	1.60932	1.13085	1.50026	1.82792	1.34103	1.74032
