# Supplementary material for: Peanut oil odor enhances the immunomodulatory effect on immunosuppressed mice by regulating the cAMP signaling pathway via the brain–spleen axis
Source: Royal Society of Chemistry journal article supplement (doi:10.1039/d3fo03629d), 2024-01-01

### cAMP signaling pathway

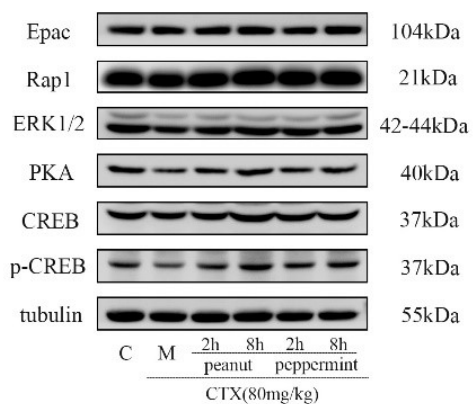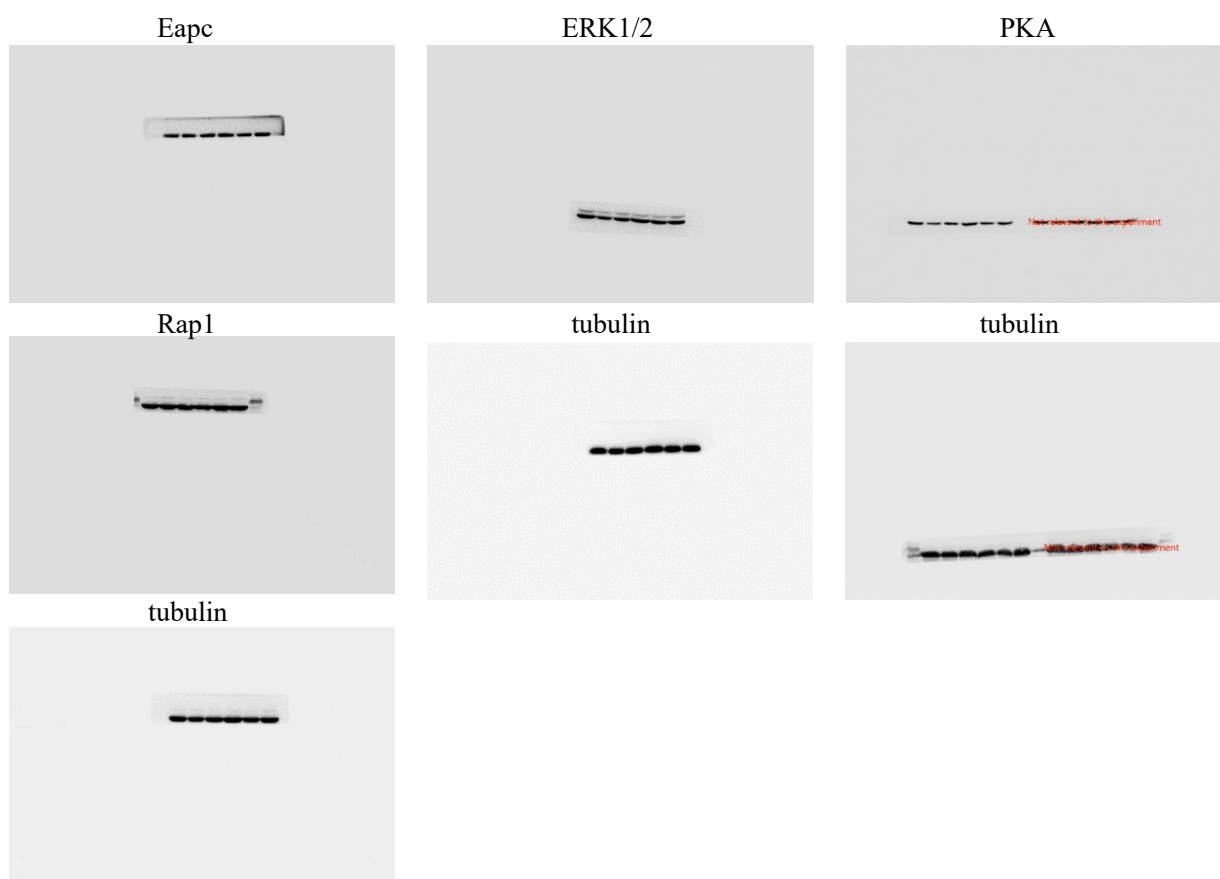

CREB

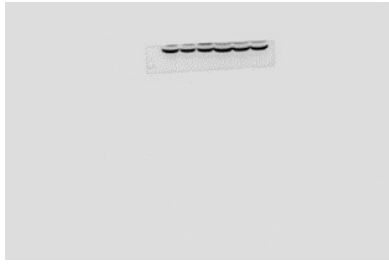

p-CREB

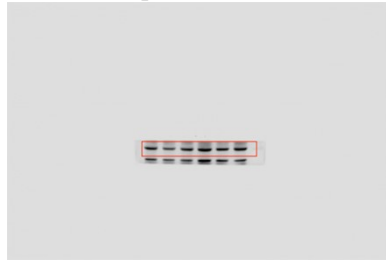

tubulin

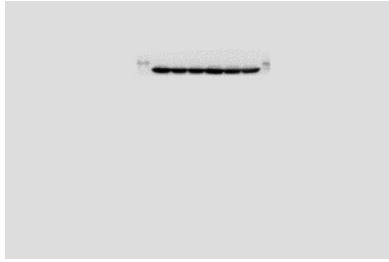

tubulin

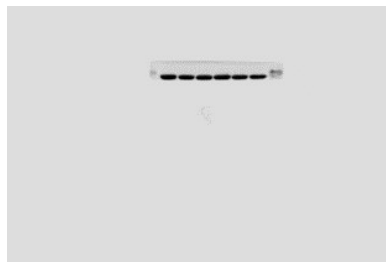

## NF- $\kappa$ B signaling pathway

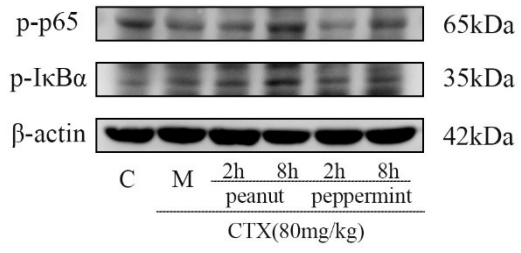

p-I $\kappa$ B

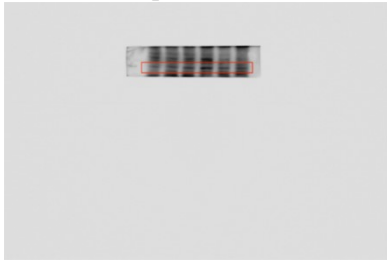

p-p65

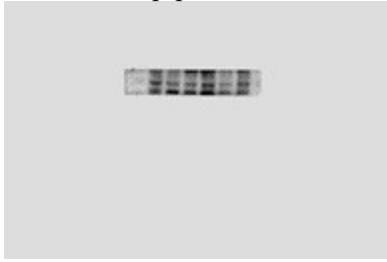

$\beta$ -actin

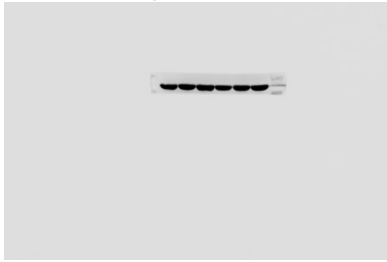

Supplement: d3fo03629d2.pdf [file d3fo03629d2.pdf]
