# Supplementary material for: Peanut oil odor enhances the immunomodulatory effect on immunosuppressed mice by regulating the cAMP signaling pathway via the brain–spleen axis
Source: Royal Society of Chemistry journal article supplement (doi:10.1039/d3fo03629d), 2024-01-01
Supplement: d3fo03629d3.pdf [file d3fo03629d3.pdf]

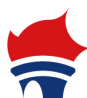

**EDITSPRINGS**

## EDITORIAL CERTIFICATE

This is to certify that the manuscript detailed below was edited by one or more of our highly qualified, native English speakers at EditSprings, to assure compliance with Anglophone academic standards in terms of style, punctuation, grammar, and spelling.

Manuscript title:

**Peanut oil odor enhances the immunomodulatory effect on immunosuppressed mice by regulating cAMP signaling pathway via brain-spleen axis**

Authors:

**Yijin Wang, Jianfu Wu, Ying Gong, Huiting Wang, Tao Wu, Rui Liu, Wenjie Sui, Min Zhang**

Date Issued:

**Jan 04 2024**

Certificate Number:

**ES-202312311646117847**

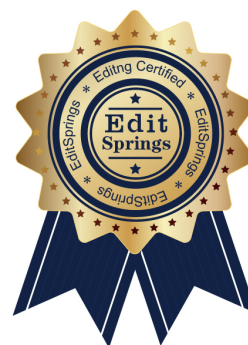

This certificate can be verified on [\\_https://www.editsprings.com/QueryCertificate.html\\_](https://www.editsprings.com/QueryCertificate.html). EditSprings hereby certifies that neither content nor the author's intentions were altered in any way during the editing process. Documents in receipt of this certification should be ready for publication as far as style and language are concerned, provided that the author(s) accepted our suggestions and changes (which remains their right and responsibility).

EditSprings offers a wide range of editing, translation, for researchers and publishers across the world. Our highly skilled editors are all established academics based in Anglophone Higher Education institutions across the world (U.K., U.S.A., Canada, Australia, and elsewhere), are experts in their respective fields, and are qualified to edit research papers authored by non-Anglophone scholars.
