# Supplementary material for: Peanut oil odor enhances the immunomodulatory effect on immunosuppressed mice by regulating the cAMP signaling pathway via the brain–spleen axis
Source: Royal Society of Chemistry journal article supplement (doi:10.1039/d3fo03629d), 2024-01-01
Supplement: d3fo03629d4.pdf [file d3fo03629d4.pdf]

Table S1 Analysis results of volatile compounds in peanut oil

| Category          | NO. | RT<br>(min) | SI <sup>a</sup> | formula                                                     | CAS        | Compound name                              | Relative<br>content<br>(%) |
|-------------------|-----|-------------|-----------------|-------------------------------------------------------------|------------|--------------------------------------------|----------------------------|
| Hydrocarbons      |     |             |                 |                                                             |            |                                            |                            |
| (5)               |     |             |                 |                                                             |            |                                            |                            |
|                   | 1   | 13.6        | 885             | C <sub>10</sub> H <sub>22</sub>                             | 124-18-5   | Decane                                     | 1.05%                      |
|                   | 2   | 14.77       | 887             | C <sub>10</sub> H <sub>16</sub>                             | 5989-27-5  | (+)-Dipentene                              | 1.87%                      |
|                   | 3   | 15.8        | 717             | C <sub>19</sub> H <sub>40</sub>                             | 10544-96-4 | 6-Methyl-octadecane                        | 0.59%                      |
|                   | 4   | 21.03       | 898             | C <sub>12</sub> H <sub>26</sub>                             | 112-40-3   | Dodecane                                   | 3.39%                      |
|                   | 5   | 27.77       | 896             | C <sub>14</sub> H <sub>30</sub>                             | 629-59-4   | Tetradecane                                | 0.96%                      |
| Acids (9)         |     |             |                 |                                                             |            |                                            |                            |
|                   | 6   | 2.33        | 818             | CH <sub>2</sub> O <sub>2</sub>                              | 64-18-6    | Formic acid                                | 0.93%                      |
|                   | 7   | 2.83        | 888             | C <sub>2</sub> H <sub>4</sub> O <sub>2</sub>                | 64-19-7    | Acetic acid                                | 6.89%                      |
|                   | 8   | 6.17        | 684             | C <sub>3</sub> H <sub>5</sub> NO <sub>4</sub>               | 504-88-1   | 3-Nitropropanoic acid                      | 0.26%                      |
|                   | 9   | 8.21        | 674             | C <sub>5</sub> H <sub>10</sub> O <sub>2</sub>               | 116-53-0   | 2-Methyl-butanoic acid                     | 0.44%                      |
|                   | 10  | 9.42        | 819             | C <sub>6</sub> H <sub>10</sub> O <sub>4</sub>               | 616-62-6   | 2-Propylmalonic acid                       | 0.57%                      |
|                   | 11  | 13.22       | 869             | C <sub>6</sub> H <sub>12</sub> O <sub>2</sub>               | 142-62-1   | Hexanoic acid                              | 2.51%                      |
|                   | 12  | 16.61       | 738             | C <sub>7</sub> H <sub>14</sub> O <sub>2</sub>               | 111-14-8   | Heptanoic acid                             | 0.63%                      |
|                   | 13  | 24.74       | 652             | C <sub>7</sub> H <sub>13</sub> NO <sub>4</sub>              | 7766-85-0  | 4-Amino-1,5-pentandioic<br>acid            | 0.13%                      |
|                   | 14  | 27.25       | 706             | C <sub>7</sub> H <sub>5</sub> N <sub>5</sub> O <sub>3</sub> | 948-60-7   | Pterin-6-carboxylic acid                   | 0.06%                      |
| Alcohols (6)      |     |             |                 |                                                             |            |                                            |                            |
|                   | 15  | 5.73        | 863             | C <sub>5</sub> H <sub>12</sub> O                            | 71-41-0    | 1-Pentanol                                 | 0.53%                      |
|                   | 16  | 8.43        | 890             | C <sub>5</sub> H <sub>6</sub> O <sub>2</sub>                | 98-00-0    | 2-Furanmethanol                            | 1.25%                      |
|                   | 17  | 8.86        | 882             | C <sub>6</sub> H <sub>14</sub> O                            | 111-27-3   | 1-Hexanol                                  | 1.87%                      |
|                   | 18  | 12.9        | 872             | C <sub>8</sub> H <sub>16</sub> O                            | 3391-86-4  | 1-Octen-3-ol                               | 0.88%                      |
|                   | 19  | 20.08       | 734             | C <sub>11</sub> H <sub>24</sub> O                           | 112-42-5   | 1-Undecanol                                | 0.85%                      |
|                   | 20  | 20.21       | 746             | C <sub>10</sub> H <sub>20</sub> O                           | 21129-27-1 | 1-Methyl-4-(1-<br>methylethyl)cyclohexanol | 0.19%                      |
| Aldehydes<br>(21) |     |             |                 |                                                             |            |                                            |                            |
|                   | 21  | 3.49        | 826             | C <sub>5</sub> H <sub>10</sub> O                            | 590-86-3   | Isovaleraldehyde                           | 0.51%                      |
|                   | 22  | 3.62        | 838             | C <sub>5</sub> H <sub>10</sub> O                            | 96-17-3    | 2-Methylbutyraldehyde                      | 0.72%                      |
|                   | 23  | 4.15        | 801             | C <sub>5</sub> H <sub>10</sub> O                            | 110-62-3   | Pentanal                                   | 0.68%                      |
|                   | 24  | 6.59        | 902             | C <sub>6</sub> H <sub>12</sub> O                            | 66-25-1    | Hexanal                                    | 6.49%                      |
|                   | 25  | 7.69        | 900             | C <sub>5</sub> H <sub>4</sub> O <sub>2</sub>                | 498-60-2   | 3-Furaldehyde                              | 1.01%                      |
|                   | 26  | 9.99        | 890             | C <sub>7</sub> H <sub>14</sub> O                            | 111-71-7   | Heptaldehyde                               | 1.07%                      |
|                   | 27  | 12.05       | 922             | C <sub>7</sub> H <sub>12</sub> O                            | 57266-86-1 | (Z)-2-Heptenal,                            | 1.98%                      |
|                   | 28  | 12.24       | 871             | C <sub>7</sub> H <sub>6</sub> O                             | 100-52-7   | Benzaldehyde                               | 3.39%                      |
|                   | 29  | 12.39       | 646             | C <sub>6</sub> H <sub>6</sub> O <sub>2</sub>                | 620-02-0   | 5-Methyl furfural                          | 0.13%                      |

|               |    |       |     |                                               |            |                                       |       |
|---------------|----|-------|-----|-----------------------------------------------|------------|---------------------------------------|-------|
|               | 30 | 13.79 | 748 | C <sub>8</sub> H <sub>16</sub> O              | 124-13-0   | Octanal                               | 3.47% |
|               | 31 | 14.18 | 642 | C <sub>5</sub> H <sub>5</sub> NO              | 1003-29-8  | Pyrrole-2-carboxaldehyde              | 0.32% |
|               | 32 | 14.93 | 771 | C <sub>8</sub> H <sub>12</sub> O              | 931-96-4   | 1-Methyl-3-cyclohexene-1-carbaldehyde | 0.36% |
|               | 33 | 15.91 | 832 | C <sub>8</sub> H <sub>14</sub> O              | 2548-87-0  | (E)-2-Octenal                         | 1.63% |
|               | 34 | 17.62 | 904 | C <sub>9</sub> H <sub>18</sub> O              | 124-19-6   | 1-Nonanal                             | 6.79% |
|               | 35 | 21.32 | 868 | C <sub>10</sub> H <sub>20</sub> O             | 112-31-2   | Decyl aldehyde                        | 0.47% |
|               | 36 | 21.67 | 778 | C <sub>9</sub> H <sub>14</sub> O              | 5910-87-2  | (E,E)-2,4-Nonadienal                  | 0.22% |
|               | 37 | 23.3  | 818 | C <sub>10</sub> H <sub>18</sub> O             | 2497-25-8  | 2-Decenal                             | 1.07% |
|               | 38 | 23.8  | 768 | C <sub>10</sub> H <sub>10</sub> O             | 1196-67-4  | 3-Phenyl-2-butenal                    | 0.56% |
|               | 39 | 24.42 | 815 | C <sub>10</sub> H <sub>16</sub> O             | 2363-88-4  | 2,4-Decadienal                        | 0.44% |
|               | 40 | 24.82 | 774 | C <sub>11</sub> H <sub>22</sub> O             | 112-44-7   | Undecanal                             | 0.12% |
|               | 41 | 26.72 | 857 | C <sub>11</sub> H <sub>20</sub> O             | 53448-07-0 | E-2-Undecenal                         | 0.38% |
| Ester (2)     |    |       |     |                                               |            |                                       |       |
|               | 42 | 12.56 | 789 | C <sub>8</sub> H <sub>16</sub> O <sub>2</sub> | 112-23-2   | Heptanol, formate                     | 0.75% |
|               | 43 | 26.8  | 784 | C <sub>9</sub> H <sub>16</sub> O <sub>2</sub> | 104-61-0   | γ-Nonanolactone                       | 0.35% |
| Ketones (5)   |    |       |     |                                               |            |                                       |       |
|               | 44 | 6.93  | 665 | C <sub>5</sub> H <sub>10</sub> O <sub>2</sub> | 5704-20-1  | 2-Hydroxy-3-pentanone                 | 0.06% |
|               | 45 | 9.61  | 738 | C <sub>7</sub> H <sub>14</sub> O              | 110-43-0   | 2-Heptanone                           | 0.62% |
|               | 46 | 15.2  | 825 | C <sub>8</sub> H <sub>14</sub> O              | 18402-82-9 | (E)-Oct-3-en-2-one                    | 0.38% |
|               | 47 | 17.17 | 659 | C <sub>9</sub> H <sub>18</sub> O              | 821-55-6   | 2-Nonanone                            | 0.80% |
|               | 48 | 20.86 | 746 | C <sub>10</sub> H <sub>20</sub> O             | 693-54-9   | 2-Decanone                            | 0.38% |
| Furans (2)    |    |       |     |                                               |            |                                       |       |
|               | 49 | 13.35 | 841 | C <sub>9</sub> H <sub>14</sub> O              | 3777-69-3  | 2-Pentylfuran                         | 1.98% |
|               | 50 | 21.89 | 847 | C <sub>8</sub> H <sub>8</sub> O               | 496-16-2   | 2,3-Dihydrobenzofuran                 | 9.04% |
| Pyrroles (2)  |    |       |     |                                               |            |                                       |       |
|               | 51 | 5.08  | 794 | C <sub>5</sub> H <sub>7</sub> N               | 96-54-8    | N-Methyl pyrrole                      | 0.27% |
|               | 52 | 16.11 | 853 | C <sub>6</sub> H <sub>7</sub> NO              | 1072-82-8  | 3-Acetyl-1H-pyrroline                 | 0.81% |
| Pyrazines (9) |    |       |     |                                               |            |                                       |       |
|               | 53 | 7.4   | 900 | C <sub>5</sub> H <sub>6</sub> N <sub>2</sub>  | 109-08-0   | 2-Methylpyrazine                      | 1.29% |
|               | 54 | 10.34 | 920 | C <sub>6</sub> H <sub>8</sub> N <sub>2</sub>  | 123-32-0   | 2,5-Dimethylpyrazine                  | 7.57% |
|               | 55 | 10.72 | 755 | C <sub>6</sub> H <sub>8</sub> N <sub>2</sub>  | 5910-89-4  | 2,3-Dimethylpyrazine                  | 0.27% |
|               | 56 | 13.67 | 839 | C <sub>7</sub> H <sub>10</sub> N <sub>2</sub> | 13925-03-6 | 2-ethyl-6-methylpyrazine              | 0.69% |
|               | 57 | 13.74 | 898 | C <sub>7</sub> H <sub>10</sub> N <sub>2</sub> | 13360-64-0 | 2-Ethyl-5-methylpyrazine              | 2.60% |
|               | 58 | 16.73 | 912 | C <sub>8</sub> H <sub>12</sub> N <sub>2</sub> | 13360-65-1 | 3-Ethyl-2,5-diMethylpyrazine          | 2.80% |
|               | 59 | 16.96 | 776 | C <sub>8</sub> H <sub>12</sub> N <sub>2</sub> | 13925-07-0 | 3,5-Dimethyl-2-ethylpyrazine          | 0.29% |
|               | 60 | 17.04 | 803 | C <sub>8</sub> H <sub>12</sub> N <sub>2</sub> | 13925-07-0 | 3,5-Dimethyl-2-ethylpyrazine          | 0.52% |
|               | 61 | 17.5  | 734 | C <sub>8</sub> H <sub>10</sub> N <sub>2</sub> | 55138-63-1 | 2-Methyl-5-(2-propenyl)-pyrazine      | 0.57% |

|             |       |     |                                               |           |                          |       |  |
|-------------|-------|-----|-----------------------------------------------|-----------|--------------------------|-------|--|
| Phenols (2) |       |     |                                               |           |                          |       |  |
| 62          | 18.04 | 735 | C <sub>6</sub> H <sub>6</sub> O <sub>3</sub>  | 118-71-8  | Maltol                   | 2.17% |  |
| 63          | 25.19 | 807 | C <sub>9</sub> H <sub>10</sub> O <sub>2</sub> | 7786-61-0 | 2-Methoxy-4-vinyl-phenol | 5.18% |  |
| Others (1)  |       |     |                                               |           |                          |       |  |
| 64          | 25.37 | 764 | C <sub>7</sub> H <sub>7</sub> NO              | 103-70-8  | N-phenyl-formamide       | 2.94% |  |

<sup>a</sup> SI: positive correlation score.
