# Supplementary material for: Peanut oil odor enhances the immunomodulatory effect on immunosuppressed mice by regulating the cAMP signaling pathway via the brain–spleen axis
Source: Royal Society of Chemistry journal article supplement (doi:10.1039/d3fo03629d), 2024-01-01
Supplement: d3fo03629d5.pdf [file d3fo03629d5.pdf]

Table S2 Analysis results of volatile compounds in peppermint oil

| Category      | NO. | RT<br>(min) | SI <sup>a</sup> | formula                                        | CAS         | Compound name                                      | Relative<br>content<br>(%) |
|---------------|-----|-------------|-----------------|------------------------------------------------|-------------|----------------------------------------------------|----------------------------|
| Alkenes (17)  | 1   | 11.25       | 930             | C <sub>10</sub> H <sub>16</sub>                | 7785-26-4   | α-Pinene                                           | 2.36%                      |
|               | 2   | 11.78       | 949             | C <sub>10</sub> H <sub>16</sub>                | 79-92-5     | Camphene                                           | 0.08%                      |
|               | 3   | 12.75       | 964             | C <sub>10</sub> H <sub>16</sub>                | 3387-41-5   | Sabinene                                           | 1.57%                      |
|               | 4   | 12.89       | 915             | C <sub>10</sub> H <sub>16</sub>                | 18172-67-3  | β-Pinene                                           | 3.05%                      |
|               | 5   | 14.36       | 920             | C <sub>10</sub> H <sub>16</sub>                | 99-86-5     | α-Terpinene                                        | 0.38%                      |
|               | 6   | 14.8        | 788             | C <sub>10</sub> H <sub>14</sub>                | 18368-95-1  | 1,3,8-p-Menthatriene                               | 0.59%                      |
|               | 7   | 15.17       | 916             | C <sub>10</sub> H <sub>16</sub>                | 13877-91-3  | β-Ocimene                                          | 0.46%                      |
|               | 8   | 15.98       | 923             | C <sub>10</sub> H <sub>16</sub>                | 99-85-4     | γ-Terpinene                                        | 0.88%                      |
|               | 9   | 17.09       | 927             | C <sub>10</sub> H <sub>16</sub>                | 586-62-9    | Terpinolene                                        | 0.40%                      |
|               | 10  | 27.27       | 927             | C <sub>15</sub> H <sub>24</sub>                | 3856-25-5   | α-Copaene                                          | 0.23%                      |
|               | 11  | 27.6        | 929             | C <sub>15</sub> H <sub>24</sub>                | 5208-59-3   | β-Bourbonene                                       | 1.12%                      |
|               | 12  | 27.77       | 923             | C <sub>15</sub> H <sub>24</sub>                | 515-13-9    | β-Elemene                                          | 0.45%                      |
|               | 13  | 28.83       | 959             | C <sub>15</sub> H <sub>24</sub>                | 87-44-5     | β-Caryophyllene                                    | 5.36%                      |
|               | 14  | 29.69       | 932             | C <sub>15</sub> H <sub>24</sub>                | 28973-97-9  | β-Farnesene                                        | 0.96%                      |
|               | 15  | 30.53       | 940             | C <sub>15</sub> H <sub>24</sub>                | 30021-74-0  | γ-Muurolene                                        | 0.47%                      |
|               | 16  | 30.76       | 922             | C <sub>15</sub> H <sub>24</sub>                | 18252-44-3  | beta-Copaene                                       | 2.97%                      |
|               | 17  | 31.34       | 880             | C <sub>15</sub> H <sub>24</sub>                | 317819-80-0 | (-)-Germacrene-D                                   | 0.34%                      |
| Alcohols (12) | 18  | 13.62       | 923             | C <sub>8</sub> H <sub>18</sub> O               | 589-98-0    | 3-Octanol                                          | 0.31%                      |
|               | 19  | 15.09       | 942             | C <sub>8</sub> H <sub>18</sub> O               | 470-82-6    | Eucalyptol                                         | 7.82%                      |
|               | 20  | 16.32       | 946             | C <sub>8</sub> H <sub>18</sub> O               | 546-79-2    | cis-4-Thujanol                                     | 0.75%                      |
|               | 21  | 17.66       | 812             | C <sub>10</sub> H <sub>18</sub> O              | 78-70-6     | Linalool                                           | 0.54%                      |
|               | 22  | 20.8        | 929             | C <sub>10</sub> H <sub>20</sub> O              | 21129-27-1  | 1-methyl-4-(1-methylethyl)-cyclohexano             | 6.98%                      |
|               | 23  | 20.22       | 813             | C <sub>10</sub> H <sub>20</sub> O              | 490-99-3    | Isomenthol                                         | 5.12%                      |
|               | 24  | 20.64       | 909             | C <sub>10</sub> H <sub>20</sub> O              | 15356-70-4  | Menthol                                            | 15.02%                     |
|               | 25  | 21.13       | 929             | C <sub>10</sub> H <sub>18</sub> O              | 7785-53-7   | α-Terpineol                                        | 0.76%                      |
|               | 26  | 21.32       | 824             | C <sub>10</sub> H <sub>16</sub> O              | 515-00-4    | (6,6-Dimethylbicyclo[3.1.1]hept-2-en-2-yl)methanol | 0.07%                      |
|               | 27  | 22.27       | 850             | C <sub>10</sub> H <sub>20</sub> O              | 40607-48-5  | 3,7-Dimethyl-2-octen-1-ol                          | 0.12%                      |
|               | 28  | 23.73       | 856             | C <sub>10</sub> H <sub>22</sub> O              | 112-30-1    | 1-Decanol                                          | 0.08%                      |
|               | 29  | 24.62       | 939             | C <sub>12</sub> H <sub>22</sub> O <sub>2</sub> | 20777-45-1  | Isopulegyl acetate                                 | 7.69%                      |
| Aldehydes (1) | 30  | 12.29       | 920             | C <sub>7</sub> H <sub>6</sub> O                | 100-52-7    | Benzaldehyde                                       | 0.10%                      |

|             |       |     |                                                |            |                                        |        |  |
|-------------|-------|-----|------------------------------------------------|------------|----------------------------------------|--------|--|
| Esters (4)  |       |     |                                                |            |                                        |        |  |
| 31          | 17.78 | 912 | C <sub>10</sub> H <sub>20</sub> O <sub>2</sub> | 2445-77-4  | 2-Methyl butyl isovalerate             | 0.21%  |  |
| 32          | 18.37 | 757 | C <sub>10</sub> H <sub>20</sub> O <sub>2</sub> | 4864-61-3  | 3-Octyl acetate                        | 0.12%  |  |
| 33          | 22.47 | 866 | C <sub>11</sub> H <sub>20</sub> O <sub>2</sub> | 35154-45-1 | cis-3-Hexenyl 3-isovalerate            | 0.12%  |  |
| 34          | 25.17 | 901 | C <sub>12</sub> H <sub>20</sub> O <sub>2</sub> | 57576-09-7 | Isopulegol acetate                     | 0.07%  |  |
| Ketones (7) |       |     |                                                |            |                                        |        |  |
| 35          | 11.88 | 942 | C <sub>7</sub> H <sub>12</sub> O               | 591-24-2   | 3-methyl-cyclohexanon                  | 0.08%  |  |
| 36          | 13.22 | 843 | C <sub>8</sub> H <sub>16</sub> O               | 106-68-3   | 3-Octanone                             | 0.08%  |  |
| 37          | 19.93 | 921 | C <sub>10</sub> H <sub>18</sub> O              | 14073-97-3 | L-Menthone                             | 21.89% |  |
| 38          | 22.8  | 884 | C <sub>10</sub> H <sub>16</sub> O              | 15932-80-6 | 2-Isopropylidene-5-methylcyclohexanone | 3.38%  |  |
| 39          | 22.89 | 888 | C <sub>10</sub> H <sub>14</sub> O              | 6485-40-1  | (-)-Carvone                            | 0.06%  |  |
| 40          | 23.29 | 899 | C <sub>10</sub> H <sub>16</sub> O              | 89-81-6    | Piperitone                             | 1.44%  |  |
| 41          | 28.03 | 843 | C <sub>11</sub> H <sub>16</sub> O              | 488-10-8   | Jasmone                                | 0.07%  |  |
| Furan (2)   |       |     |                                                |            |                                        |        |  |
| 42          | 9.84  | 924 | C <sub>8</sub> H <sub>16</sub> O               | 41239-48-9 | 2,5-Diethyltetrahydrofuran             | 0.08%  |  |
| 43          | 20.13 | 855 | C <sub>10</sub> H <sub>14</sub> O              | 494-90-6   | Menthofuran                            | 4.80%  |  |
| Other (1)   |       |     |                                                |            |                                        |        |  |
| 44          | 34.09 | 926 | C <sub>15</sub> H <sub>24</sub> O              | 1139-30-6  | Caryophyllene oxide                    | 0.58%  |  |

<sup>a</sup> SI: positive correlation score.
